# Supplementary material
Source: HighWire-hosted journal article supplement (http://d2538ggaoe6cji.cloudfront.net/highwire/filestream/47220/field_highwire_adjunct_files/4/136531-5.pdf)
Supplement: 136531-5.pdf [file 136531-5.pdf]

**S5 Table. Equations describing change in relative volume of the interstitial space**

| <b>Dataset</b> | <b>Relative volume of interstitial space<br/>(cm<sup>3</sup>/cm<sup>3</sup> tissue)</b> |
|----------------|-----------------------------------------------------------------------------------------|
| Roland         | $Vol_{IS} = 0.8323 \cdot e^{(-0.239 \cdot V(t))}$                                       |
| Zibara         | $Vol_{IS} = 0.8247 \cdot e^{(-0.069 \cdot V(t))}$                                       |
| Tan            | $Vol_{IS} = 0.8343 \cdot e^{(-0.062 \cdot V(t))}$                                       |
| Volk (2008)    | $Vol_{IS} = 0.8628 \cdot e^{(-0.068 \cdot V(t))}$                                       |
| Volk (2011a)   | $Vol_{IS} = 0.8557 \cdot e^{(-0.081 \cdot V(t))}$                                       |
| Volk (2011b)   | $Vol_{IS} = 0.8536 \cdot e^{(-0.068 \cdot V(t))}$                                       |
